# Supplementary material for: Timing and location are keys: ERCP success and its benefit in MPD injury post-acute pancreatitis
Source: Research Square preprint supplement (doi:10.21203/rs.3.rs-8010012/v1), 2025-12-30
Supplement: Supplementary file 1 [file 580df226ac6f997c67876199.docx]

**Univariate logistic regression for predictors of technical success in patients with pancreatic duct injury undergoing ERCP**

| **Variables** | **Technical success (43)** | **Technical failure (20)** | ***P*** | **OR (95%CI)** |
| --- | --- | --- | --- | --- |
| Sex,n (%) |  |  |  |  |
| Male | 27 (62.8) | 14 (70.0) |  | 1.00 (Reference) |
| Female | 16 (37.2) | 6 (30.0) | 0.576 | 1.38 (0.44 ~ 4.32) |
| Age (yr), mean (SD) | 45.26 ± 13.54 | 40.15 ± 14.24 | 0.175 | 1.03 (0.99 ~ 1.07) |
| BMI (kg/m2), mean (SD) | 24.84 ± 3.53 | 22.99 ± 4.55 | **0.089** | 1.14 (0.98 ~ 1.34) |
| Aetiology |  |  |  |  |
| Biliary | 28 | 14 |  | 1.00 (Reference) |
| Hypertriglyceridemia  Others | 13  2 | 6  0 | 0.892  0.993 | 1.08 (0.34 ~ 3.46)  7825680.39 (0.00 ~ Inf) |
| Local complications |  |  |  |  |
| ANC | 6 | 2 |  | 1.00 (Reference) |
| APFC | 1 | 0 | 0.992 | 1919270.95 (0.00 ~ Inf) |
| IPN | 7 | 2 | 0.893 | 1.17 (0.12 ~ 10.99) |
| PP | 9 | 8 | 0.302 | 0.37 (0.06 ~ 2.41) |
| WON | 15 | 7 | 0.719 | 0.71 (0.11 ~ 4.47) |
| Others | 5 | 1 | 0.708 | 1.67 (0.11 ~ 24.26) |
| IOP  < 90 days  > 90 days | 25  18 | 4  16 | **0.007** | 1.00 (Reference)  0.18 (0.05 ~ 0.63) |
| WBC, median (IQR)  CRP (mg/L), median (IQR)  Somatostatin or its analogues  Yes  Not  Serum albumin (g/L), mean (SD)  MPD injury location | 7.09 (4.88,9.06)  20.3 (3.30,67.40)  25  18  35.18 ± 5.34 | 5.87 (4.31,7.62)  3.95 (1.10,30.63)  10  10  37.85 ± 5.00 | 0.192  0.258  0.546  **0.007** | 1.14 (0.93 ~ 1.40)  1.01 (0.99 ~ 1.02)  1.00 (Reference)  1.39 (0.48 ~ 4.03)  0.90 (0.81 ~ 1.01) |
| Head and neck | 25 | 16 |  | 1.00 (Reference) |
| Other parts | 18 | 4 | **0.098** | 2.88 (0.82 ~ 10.07) |

Abbreviations: ANC, Acute necrotic collection; APFC, Acute peri-pancreatic fluid collection; BMI, body mass index; CRP, C-reactive protein; ds, days; ERCP, Endoscopic retrograde cholangio-pancreatography; IOP, Interval from onset of acute pancreatitis to the procedure; IQR, Interquartile range; IPN, Infected pancreatic infection; MPD, Main pancreatic duct; PP, Pancreatic pseudocyst; SD, Standard Deviation; WON,Walled-off necrosis; WBC, white blood cell; yr, year.
