# Supplementary material for: Timing and location are keys: ERCP success and its benefit in MPD injury post-acute pancreatitis
Source: Research Square preprint supplement (doi:10.21203/rs.3.rs-8010012/v1), 2025-12-30
Supplement: Supplementary file 2 [file a3a941131f34aa642656c4d6.docx]

**Location of MPD injuries confirmed by ERCP**

| **Location, n (%)** | **EPF (39)** | **Non-EPF (24)** |
| --- | --- | --- |
| Head and neck  Body  Tail  Non-injury | 23 (58.97)  9 (23.08)  7 (17.95)  0 (0) | 16 (66.67)  1 (4.17)  1 (4.17)  6 (25.00) |

Abbreviations: ERCP, Endoscopic retrograde cholangiopancreatography; EPF, External pancreatic fistula; MPD, Main pancreatic duct.
