# Supplementary material for: Timing and location are keys: ERCP success and its benefit in MPD injury post-acute pancreatitis
Source: Research Square preprint supplement (doi:10.21203/rs.3.rs-8010012/v1), 2025-12-30
Supplement: Supplementary file 3 [file b299b7f9e972a72c0617e5c5.docx]

**Baseline demographics and clinical characteristics of successful and failed MPD opacification undergoing ERCPa**

| **Variables** | **Total**  **(n = 78)** | **Successful MPD opacification**  **(n = 63)** | **Failed MPD opacification**  **(n = 15)** | ***P*** |
| --- | --- | --- | --- | --- |
| Sex, n (%) |  |  |  | 0.188 |
| Male | 54 (69.23) | 41 (65.08) | 13 (86.67) |  |
| Female | 24 (30.77) | 22 (34.92) | 2 (13.33) |  |
| Age (yr), mean (SD) | 44.68 ± 13.57 | 43.63 ± 13.86 | 49.07 ± 11.68 | 0.165 |
| BMI (kg/m2), mean (SD) | 25.13 ± 2.06 | 24.97 ± 2.14 | 25.80 ± 1.57 | 0.163 |
| Aetiology |  |  |  | 0.092 |
| Biliary | 51 (65.38) | 42 (66.67) | 9 (60.00) |  |
| Hypertriglyceridemia  Others | 22 (28.21)  5 (6.41) | 19 (30.16)  2 (3.17) | 3 (20.00)  3 (20.00) |  |
| Local complications |  |  |  | 0.938 |
| ANC | 11 (14.10) | 8 (12.70) | 3 (20.00) |  |
| APFC | 1 (1.28) | 1 (1.59) | 0 (0.00) |  |
| IPN | 10 (12.82) | 9 (14.29) | 1 (6.67) |  |
| PP | 21 (26.92) | 17 (26.98) | 4 (26.67) |  |
| WON | 28 (35.90) | 22 (34.92) | 6 (40.00) |  |
| Others | 7 (8.97) | 6 (9.52) | 1 (6.67) |  |
| WBC, median (IQR)  CRP (mg/L), median (IQR)  Serum albumin (g/L),  mean (SD) | 6.08 (4.71, 8.72)  25.60 (5.00, 62.50)  35.85 ± 5.54 | 6.46 (4.69, 8.75)  20.75 (4.38, 59.85)  36.03 ± 5.34 | 5.34 (4.75, 7.93)  34.30 (7.05, 89.50)  35.07 ± 6.44 | 0.586  0.352  0.551 |

Abbreviations: ANC, Acute necrotic collection; APFC, Acute peri-pancreatic fluid collection; BMI, body mass index; CRP, C-reactive protein; ds, days; ERCP, Endoscopic retrograde cholangio-pancreatography; IOP, Interval from onset of acute pancreatitis to the procedure; IQR, Interquartile range; IPN, Infected pancreatic infection; MPD, Main pancreatic duct; PP, Pancreatic pseudocyst; SD, Standard Deviation; WON,Walled-off necrosis; WBC, white blood cell; yr, year.
